# Supplementary material for: Evolution and genome specialization of Brucella suis biovar 2 Iberian lineages
Source: BMC Genomics. 2017 Sep 12;18:726. doi: 10.1186/s12864-017-4113-8 (PMC5596481; doi:10.1186/s12864-017-4113-8)
Supplement: Supplementary file 4 — Summary statistics for assembly of five B. suis biovar 2 strains isolates from wild boars; Table S4. General features of B. suis biovar 2 genomes. (XLSX 13 kb) [file 12864_2017_4113_MOESM4_ESM.xlsx]

## Sheet: Table S3
Additional file 4: Table S3. Summary statistics for assembly of five B. suis biovar 2 strains isolates from wild boars.
Statistics	PT09143	PT09172	Bs143CITA	Bs364CITA	Bs396CITA
Number of raw reads	8,408,102	12,172,794	10,795,456	10,091,666	8,423,200
Sequencing Coverage depth (X)	89.36	128.13	113.65	106.10	88.57
Number of reads used	8,123,604	11,727,505	10,434,053	9,524,505	8,150,997
Kmer used (Velvet)	21	23	21	29	21
Estimated Genome Size (bp)	3,293,158	3,297,697	3,301,707	3,302,044	3,304,238
Number of molecules	2	2	2	2	2
Median coverage depth	35.59	44.86	45.90	19.79	35.70
Number of contigs	116	65	61	55	77
N50	56.902	100.353	122.343	123.75	83.863
Max. contig (bp)	163.9	208.981	284.642	256.126	215.336
Min. contig (bp)	611	611	611	611	542

## Sheet: Table S4
Additional file 4: Table S4. General features of B. suis biovar 2 genomes
Genome	PT09143	PT09172	Bs143CITA	Bs364CITA	Bs396CITA
NCBI reference sequence (Chr I/ Chr II)	NZ_CP007691.1/ NZ_CP007692.1	NZ-CP007693.1/ NZ_CP007694.1	NZ_CP007695.1/ NZ_CP007696.1	NZ_CP007697.1/ NZ_CP007698.1	NZ_CP007720.1/ NZ_CP007721.1
Chr I size (bp)	1,926,480	1,926,716	1,926,295	1,927,594	1,927,083
Chr II size (bp)	1,398,285	1,398,326	1,398,244	1,401,378	1,401,375
Total size (bp)	3,324,765	3,325,042	3,324,539	3,328,972	3,328,458
CDS	3.014	3.015	3.015	3.018	3.027
Genes	3.167	3.168	3.168	3.173	3.178
Hypothetical proteins	774	726	790	750	745
Pseudogenes	89	89	89	91	87
Frameshifted genes	67	65	67	66	62
rRNA	9	9	9	9	9
tRNA	54	54	54	54	54
ncRNA	1	1	1	1	1
Clone (Haplotype)	Iberian (2e)	Iberian (2d)	Iberian (2e)	Central-European (2c)	Central-European (2c)
Country	Portugal	Portugal	Spain	Spain	Spain
Reference	Ferreira et al., 2014a	Ferreira et al., 2014a	Ferreira et al., 2014a	Ferreira et al., 2014b	Ferreira et al., 2014b
